# Supplementary material for: Impact of chelation on anticancer activities of organometallic ruthenium(ii) complexes containing 2,5-di(1H-pyrazol-1-yl)-1,4-benzoquinone: synthesis, structure, DNA/protein binding, antioxidant activity and cytotoxicity
Source: Royal Society of Chemistry journal article supplement (doi:10.1039/c6ra05867a), 2016-01-01

# Supporting Information for:

## **Impact of chelation on anticancer activities of organometallic ruthenium(II) complexes containing 2,5-di(1*H*-pyrazol-1-yl)-1,4-benzoquinone: Synthesis, structure, DNA/protein binding, antioxidant activity and cytotoxicity**

Thangavel Sathiya Kamatchi,<sup>a</sup> Palaniappan Kalaivani,<sup>a</sup> Frank R. Fronczek,<sup>b</sup> Karuppanan Natarajan\*<sup>a</sup>

<sup>a</sup>*Department of Chemistry, Bharathiar University, Coimbatore 641046, India.*

*E-mail: k\_natraj6@yahoo.com; Tel.: +91 422 2428319; Fax: +91 422 2422387.*

<sup>b</sup>*Department of Chemistry, Louisiana State University, Baton Rouge, LA 70803, USA.*

## Table of Contents

- (1) **Fig. S1**  $^1\text{H}$ -NMR spectrum of ligand **LH**, 2,5-di(1H-pyrazol-1-yl)-1,4-benzoquinone
- (2) **Fig. S2**  $^1\text{H}$ -NMR spectrum of the complex **3**
- (3) **Fig. S3**  $^1\text{H}$ -NMR spectrum of the complex **4**
- (4) **Fig. S4**  $^{13}\text{C}$ -NMR spectrum of the complex **3**
- (5) **Fig. S5**  $^{13}\text{C}$ -NMR spectrum of the complex **4**
- (6) **Fig. S6** Packing diagram of the unit cell and intermolecular interactions for complex **3**
- (7) **Fig. S7** Packing diagram of the unit cell and intermolecular interactions for complex **4**
- (8) **Fig. S8** The emission spectra of the DNA–EB system ( $\lambda_{\text{exc}} = 515 \text{ nm}$ ,  $\lambda_{\text{em}} = 530\text{--}750 \text{ nm}$ ), in the presence of the ligand **H<sup>2</sup>L** and complexes 1-4.  $[\text{DNA}] = 10 \text{ }\mu\text{M}$ ,  $[\text{Complex}] = 0\text{--}50 \text{ }\mu\text{M}$ ,  $[\text{EB}] = 10 \text{ }\mu\text{M}$ . The arrow shows the emission intensity changes upon increasing compound concentration
- (9) **Fig. S9** Synchronous spectra of BSA ( $1 \text{ }\mu\text{M}$ ) in the presence of increasing amounts of the ligand **LH** and complexes **1-4** for a wavelength difference of  $\Delta\lambda = 15 \text{ nm}$ . The arrow shows the emission intensity changes upon increasing concentration of compound

(1) **Fig. S1**  $^1\text{H-NMR}$  spectrum of ligand **LH**, 2,5-di(1H-pyrazol-1-yl)-1,4-benzoquinone

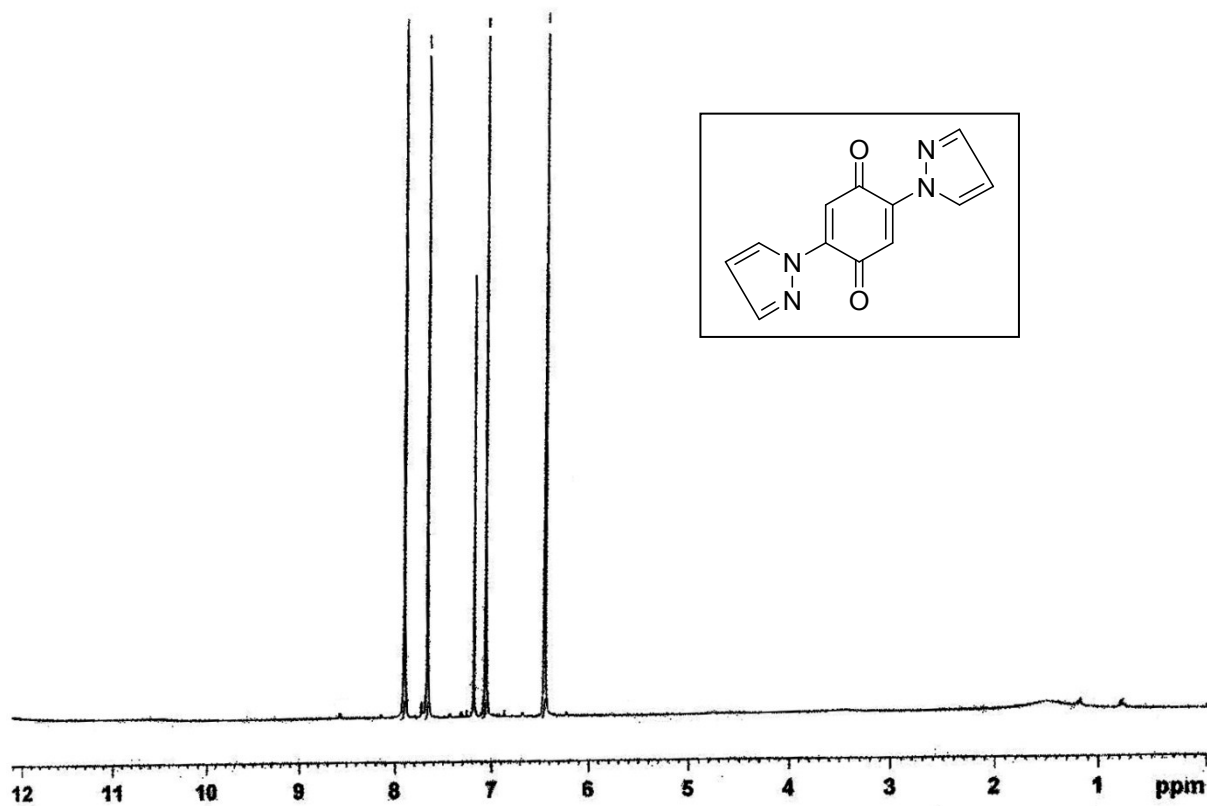

(2) **Fig. S2**  $^1\text{H-NMR}$  spectrum of the complex **3**

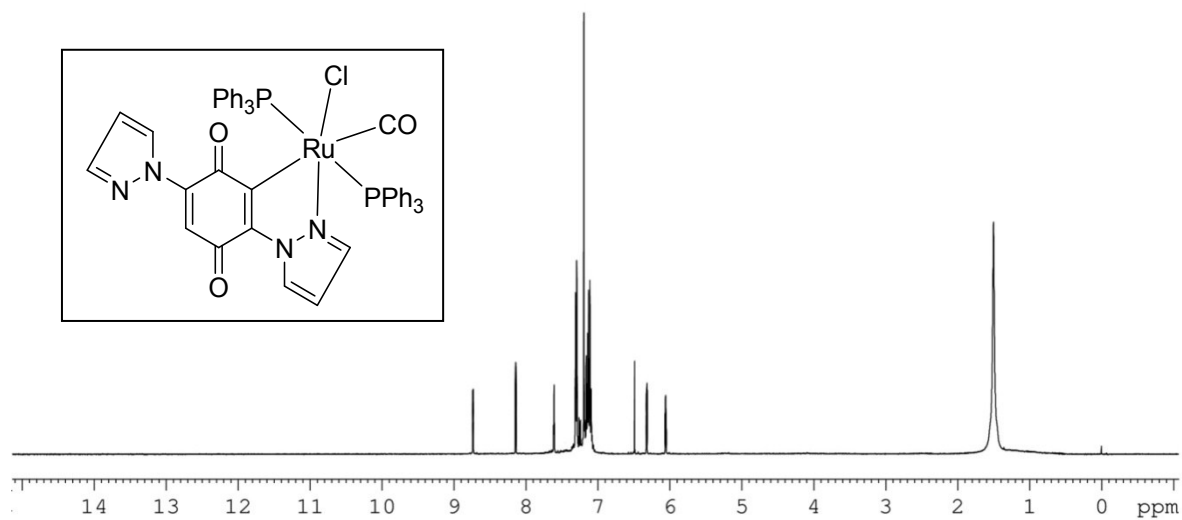

(3) **Fig. S3**  $^1\text{H-NMR}$  spectrum of the complex **4**

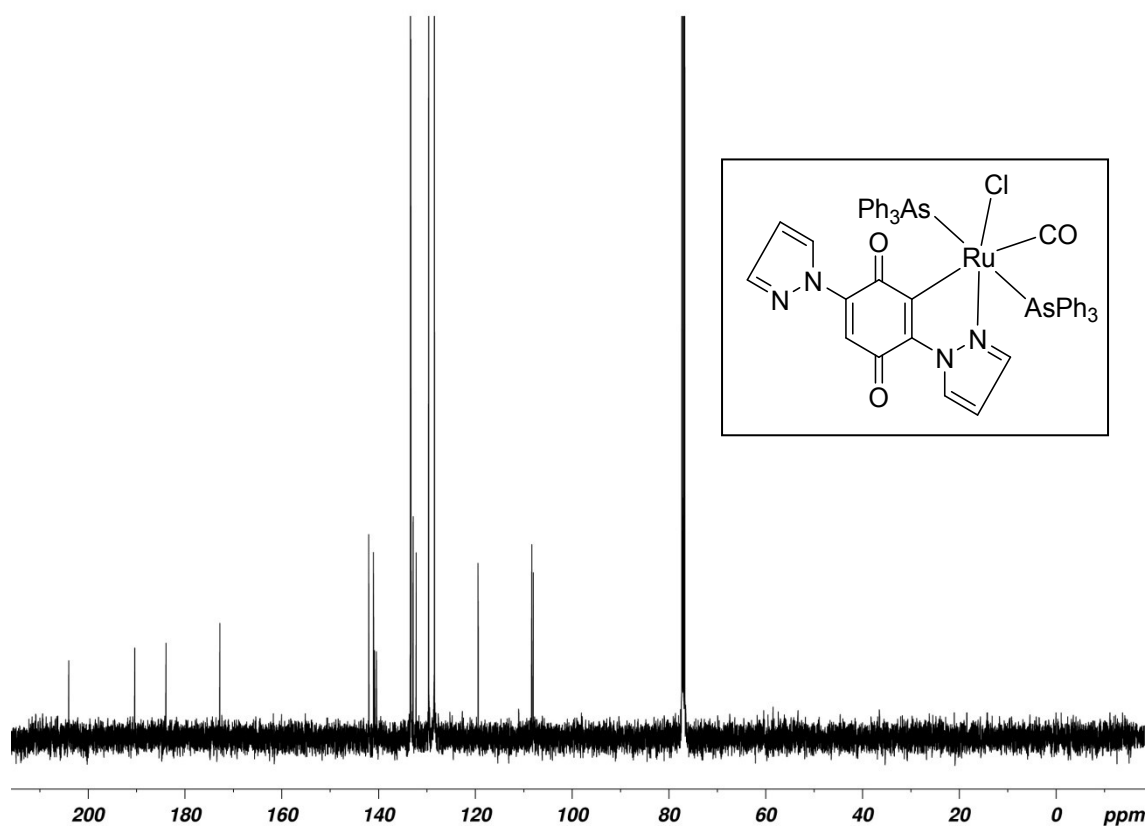

(4) **Fig. S4**  $^{13}\text{C}$ -NMR spectrum of the complex **3**

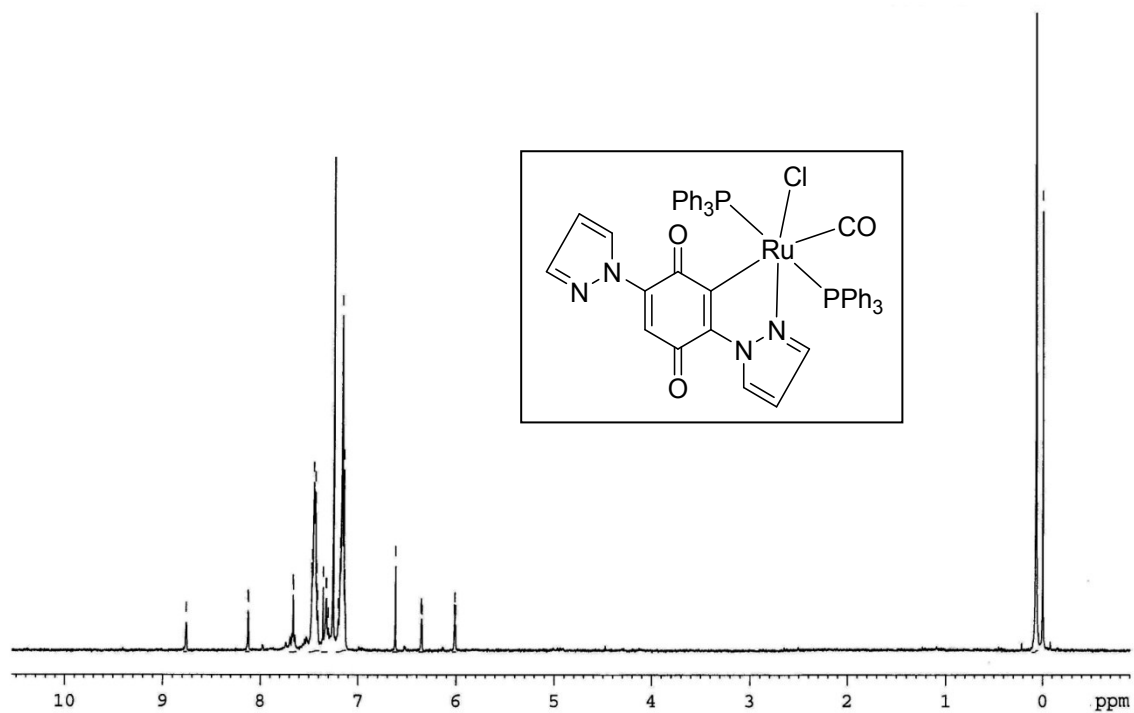

(5) **Fig. S5**  $^{13}\text{C}$ -NMR spectrum of the complex **4**

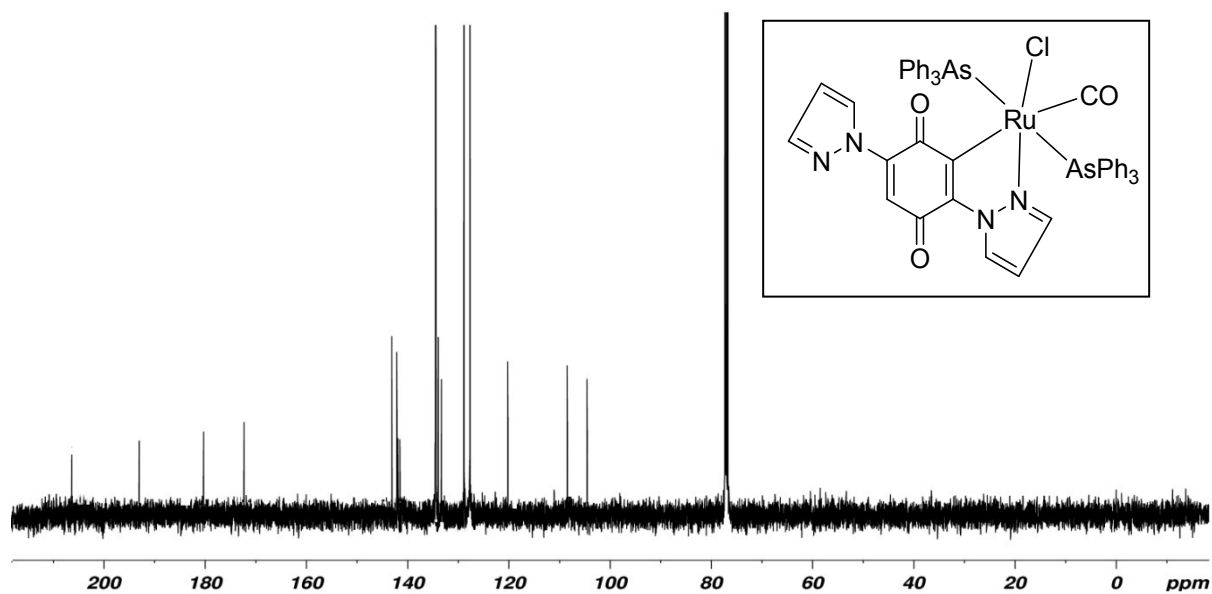

(6) **Fig. S6** Packing diagram of the unit cell and intermolecular interactions for complex **3**

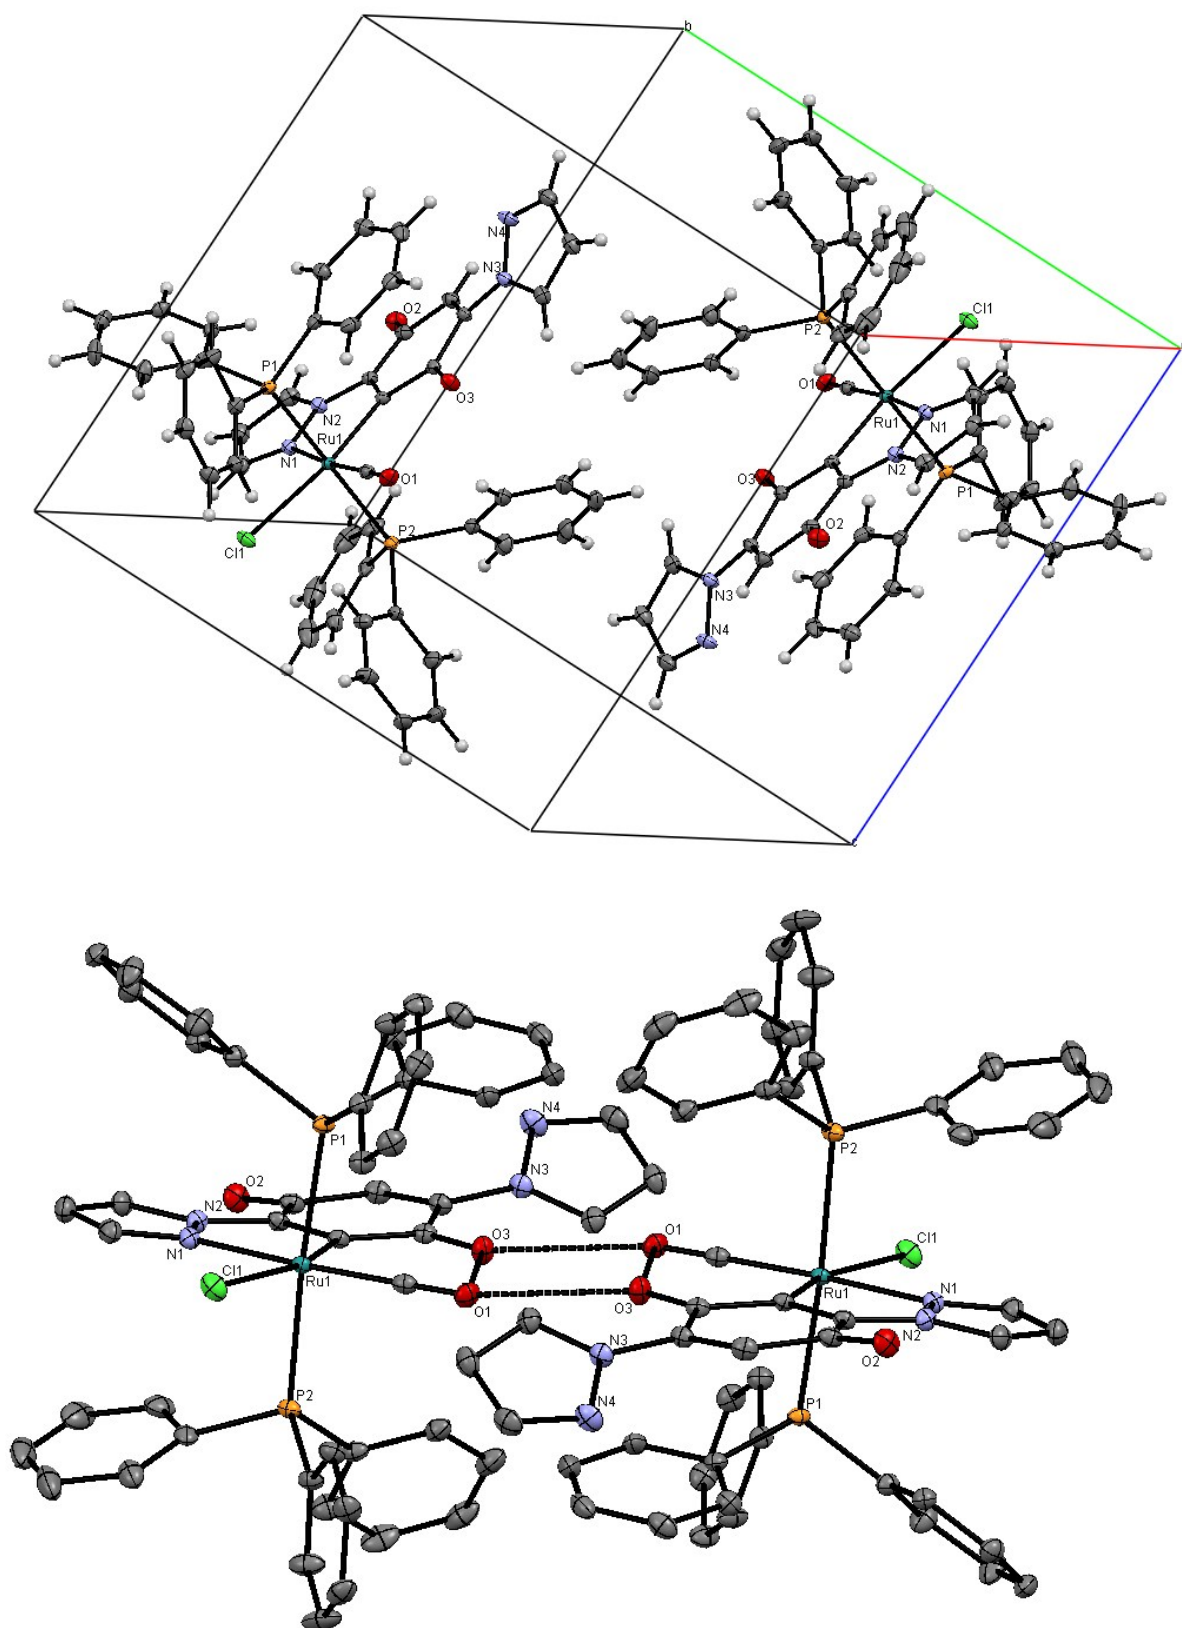

(7) **Fig. S7** Packing diagram of the unit cell and intermolecular interactions for complex 4

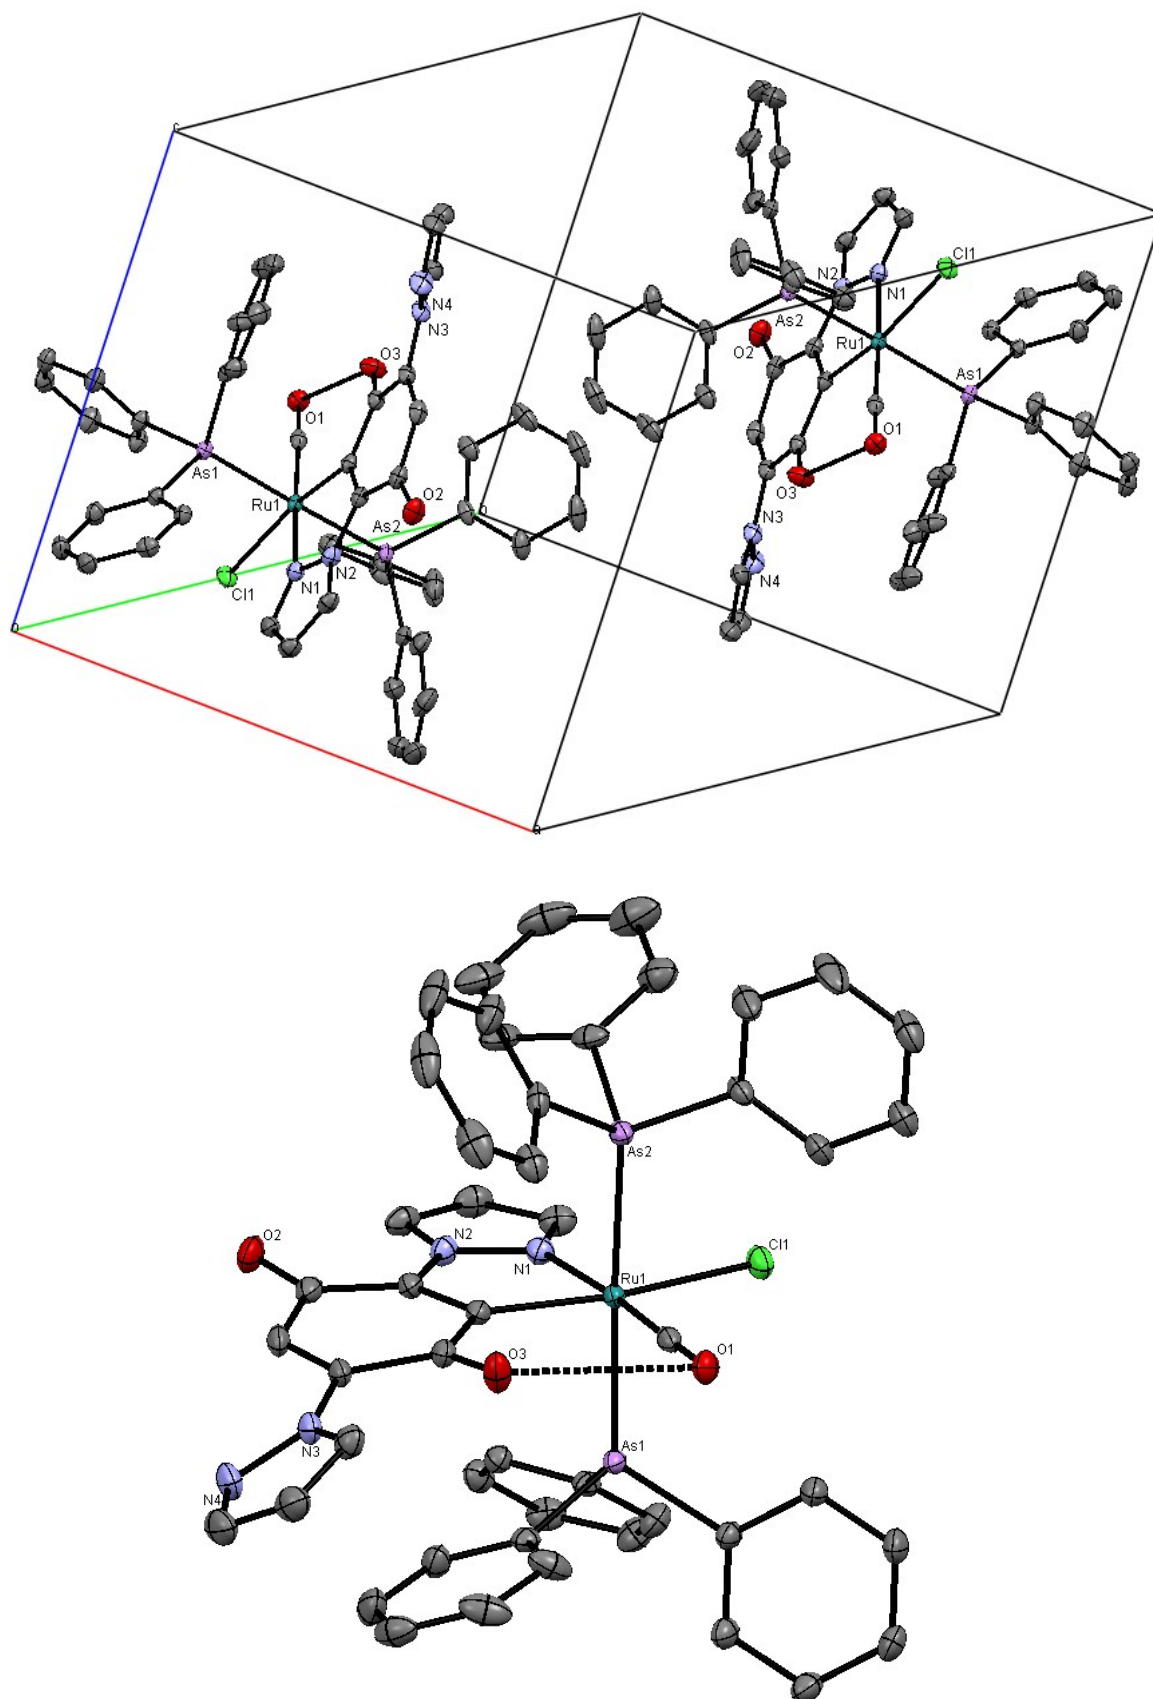

- (8) **Figure S8** The emission spectra of the DNA–EB system ( $\lambda_{\text{exc}} = 515 \text{ nm}$ ,  $\lambda_{\text{em}} = 530\text{--}750 \text{ nm}$ ), in the presence of the ligand  $\text{H}^2\text{L}$  and complexes **1-4**.  $[\text{DNA}] = 10 \text{ }\mu\text{M}$ ,  $[\text{Complex}] = 0\text{--}50 \text{ }\mu\text{M}$ ,  $[\text{EB}] = 10 \text{ }\mu\text{M}$ . The arrow shows the emission intensity changes upon increasing complex concentration.

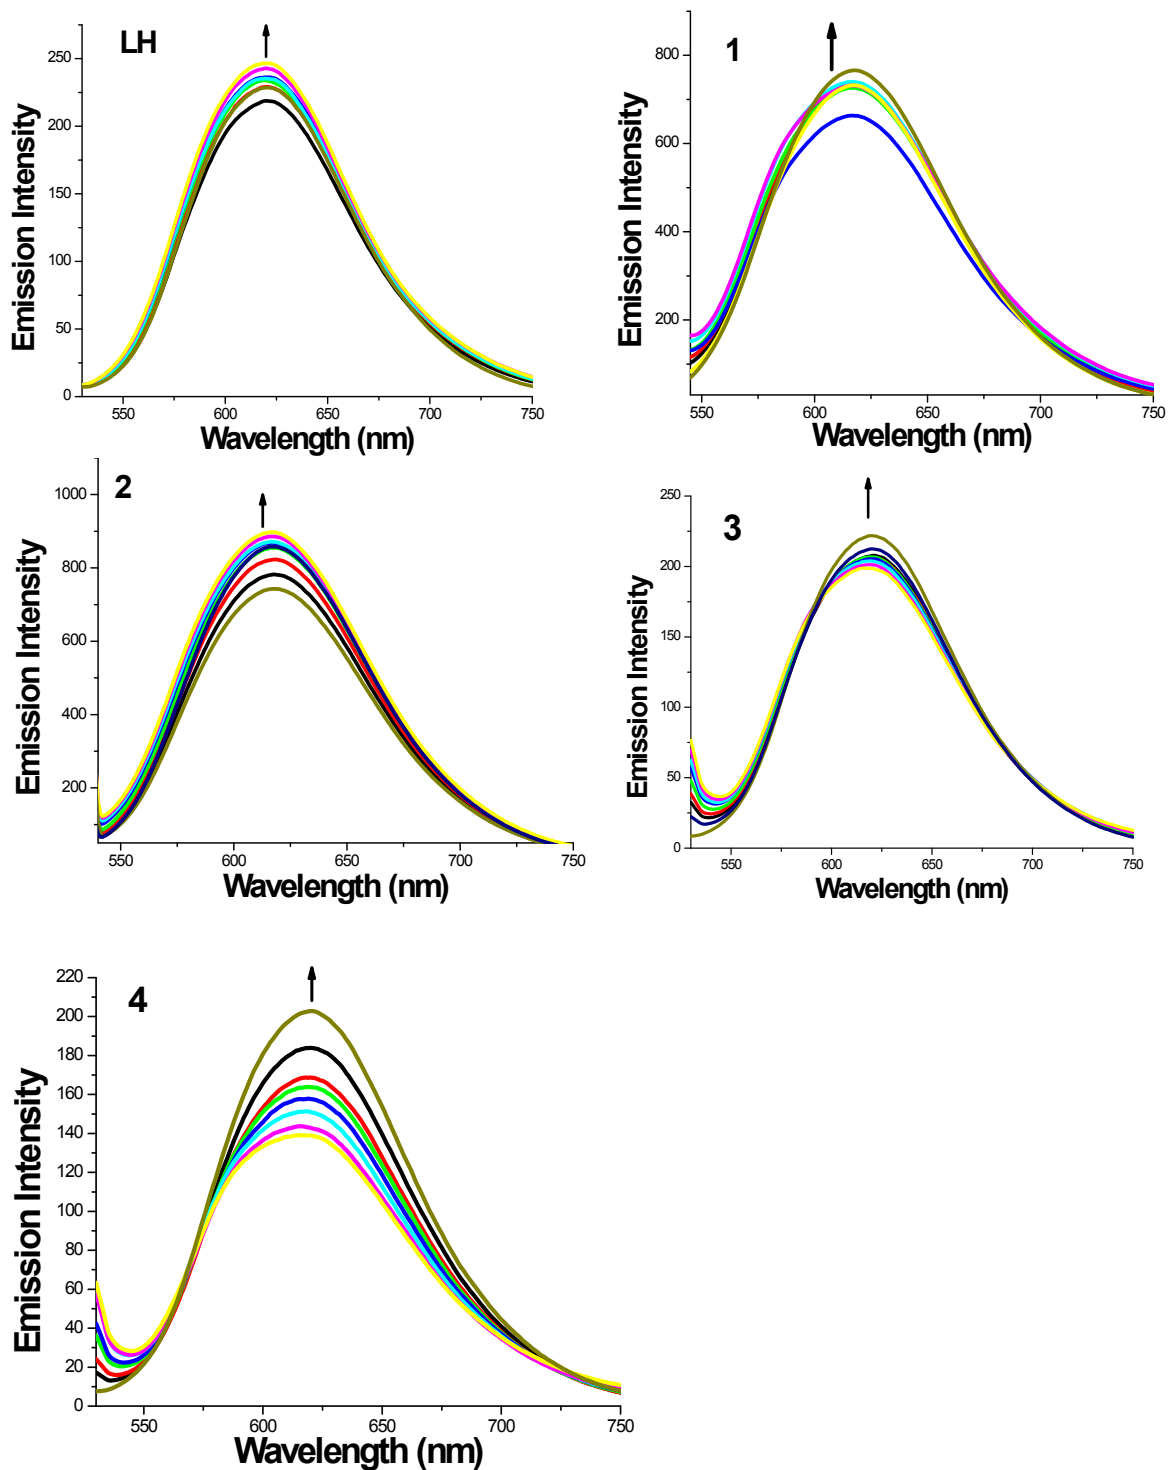



- (9) **Fig. S9** Synchronous spectra of BSA (1  $\mu\text{M}$ ) in the presence of increasing amounts of the ligand **LH** and complexes **1-4** for a wavelength difference of  $\Delta\lambda = 15$  nm. The arrow shows the emission intensity changes upon increasing concentration of compound

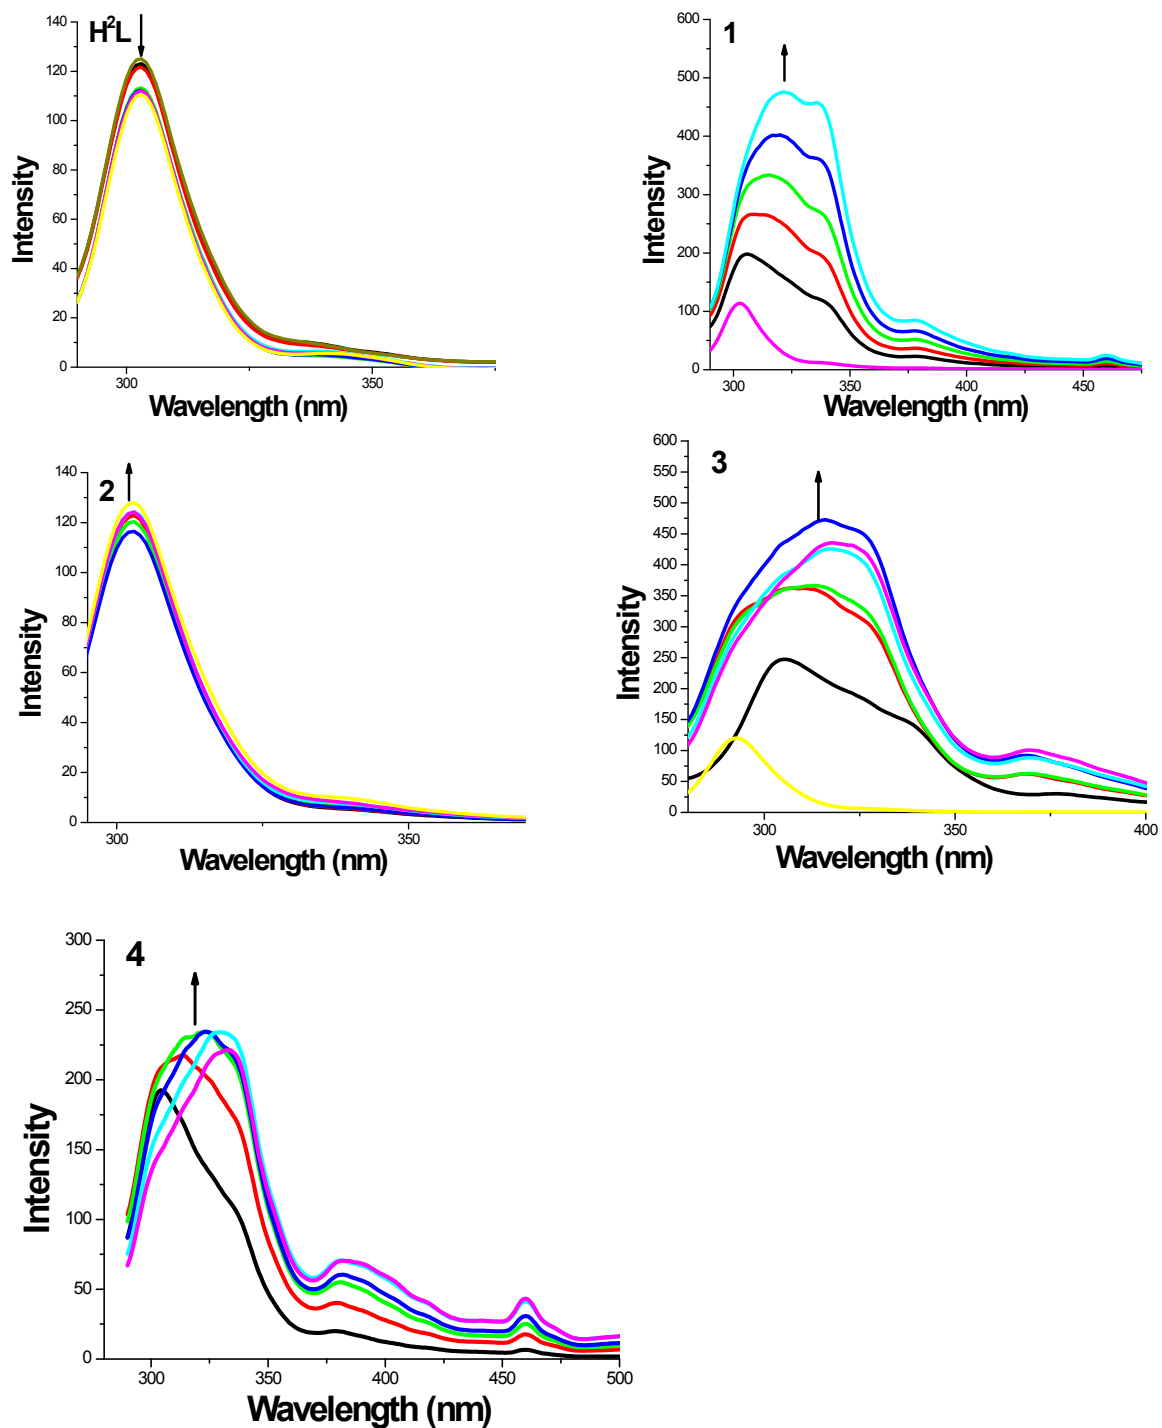

Supplement: c6ra05867a1.pdf [file c6ra05867a1.pdf]
